# Supplementary material for: The first molecular detection of equine piroplasmosis in Vietnam
Source: Research Square preprint supplement (doi:10.21203/rs.3.rs-7848604/v1), 2025-10-31
Supplement: Supplementary file 1 [file 4dd8500fb1cbadcc0177eaca.xlsx]

## Sheet: Munka1
GenBank accession	Ditribution	Clade
HQ895973.1	Africa	Outgroup
HQ895974.1	Africa	Outgroup
HQ895975.1	Africa	Outgroup
HQ895984.1	Africa	Outgroup
HQ895985.1	Africa	Outgroup
EU888902-1	South Africa	A
JX177670-1	USA	A
KU672386-1	USA	A
KX227638-1	Israel	A
KY111762-2	Cuba	A
KY464035-1	Brazil	A
KY952230-1	Brazil	A
AY150062-2	Spain	A
MG569904-1	Turkey	A
MK392050-1	Israel	A
AB515310-1	Sudan	B
EU642507-1	South Africa	B
KF597073-1	Kenya	B
KF597077-1	Kenya	B
KF597078-1	Kenya	B
KF597081-1	Kenya	B
EU642511-1	South Africa	C
EU888903-1	South Africa	C
JQ390047-1	Mexico	C
KU240067-1	Brazil	C
KU240070-1	Brazil	C
KU240071-1	Brazil	C
KX722513-1	Brazil	C
KY111760-2	Cuba	C
KY464032-1	Brazil	C
MG052901-1	Brazil	C
AB515311-1	Sudan	D
AB515312-1	Sudan	D
AB515313-1	Sudan	D
AB515314-1	Sudan	D
EU642509-1	South Africa	D
KX227624-1	Israel	D
KX227627-1	Israel	D
KX227636-1	Israel	D
MG569895-1	Turkey	D
MG569900-1	Turkey	D
AY534882-1	Spain	E
DQ287951-1	Spain	E
HM229407-1	South Korea	E
HM229408-1	South Korea	E
KF559357-1	China	E
KM046918-1	Switzerland	E
KM046919-1	Switzerland	E
KM046920-1	Switzerland	E
KM046922-1	Hungary	E
LC431546-1	Saudi Arabia	E
PV688145-1	VIETNAM	E
PV688146-1	VIETNAM	E
PV688147-1	VIETNAM	E
PV688148-1	VIETNAM	E
PV688152-1	VIETNAM	E
PV688154-1	VIETNAM	E
PV688149-1	VIETNAM	A
PV688150-1	VIETNAM	A
PV688151-1	VIETNAM	A
PV688153-1	VIETNAM	A
7.2HM-N006	VIETNAM	C
15.2HM-N041	VIETNAM	C
18.3HM-N15	VIETNAM	A
21.3HM-N17	VIETNAM	A
41.1TM-N44	VIETNAM	C
43.1TM-N48	VIETNAM	A
84.3TM-N04	VIETNAM	E
107.3TM-N33	VIETNAM	A
120.2LM-N021	VIETNAM	A
121.2LM-N026	VIETNAM	A
123.2LM-N09	VIETNAM	A
127.2LM-N020	VIETNAM	A
136.3LM-N07	VIETNAM	E
144.4LM-N13	VIETNAM	E
